# Supplementary material for: Distribution and life-history of spurdog (Squalus acanthias) along the Norwegian coast inferred from a five-year fishery-independent longline survey
Source: Research Square preprint supplement (doi:10.21203/rs.3.rs-8583209/v1), 2026-02-16
Supplement: Supplementary file 1 [file 6587060189237d712f519d9b.docx]

**Supplementary material for:** Delaval A, Andrade H, Nilsen T, Vollen T, Lavezza R, Larsen TE, Bruvold IM, Berg E and Albert OT. Distribution and life-history of spurdog (*Squalus acanthias*) along the Norwegian coast inferred from a five-year fishery-independent longline survey.


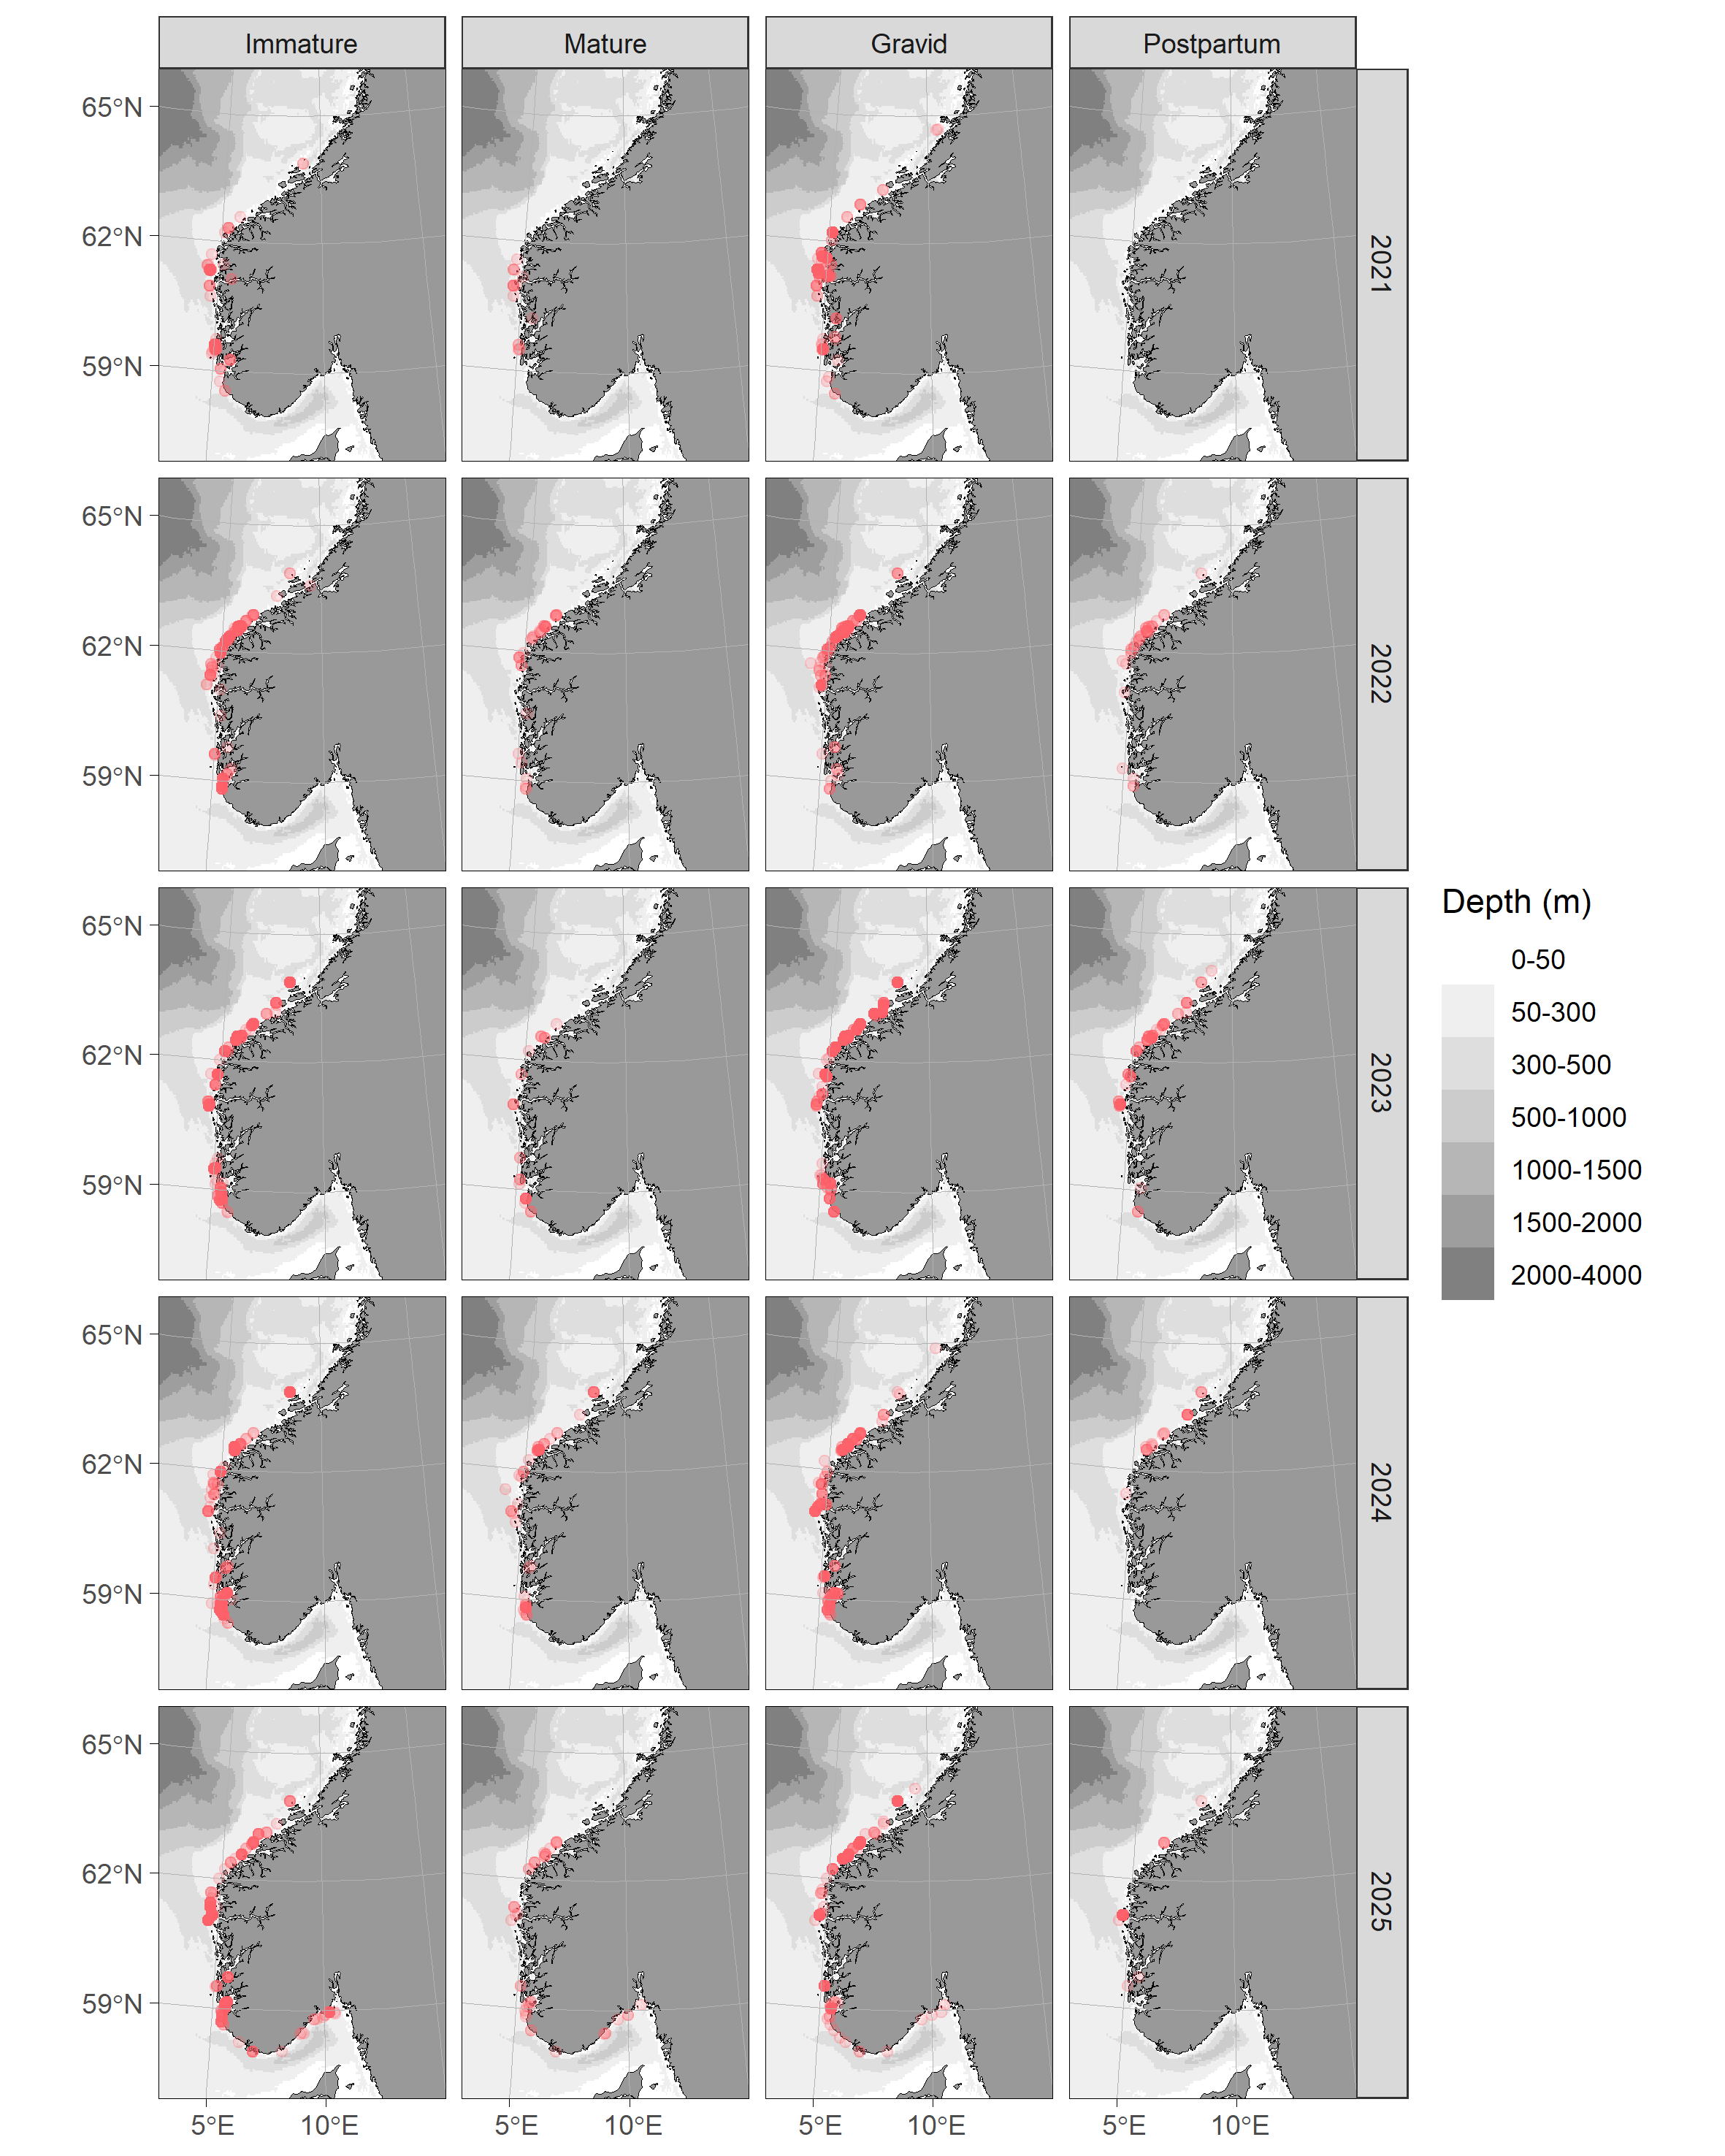


Supplementary figure 1: Distribution of females across years, with maturity stages grouped into four categories.


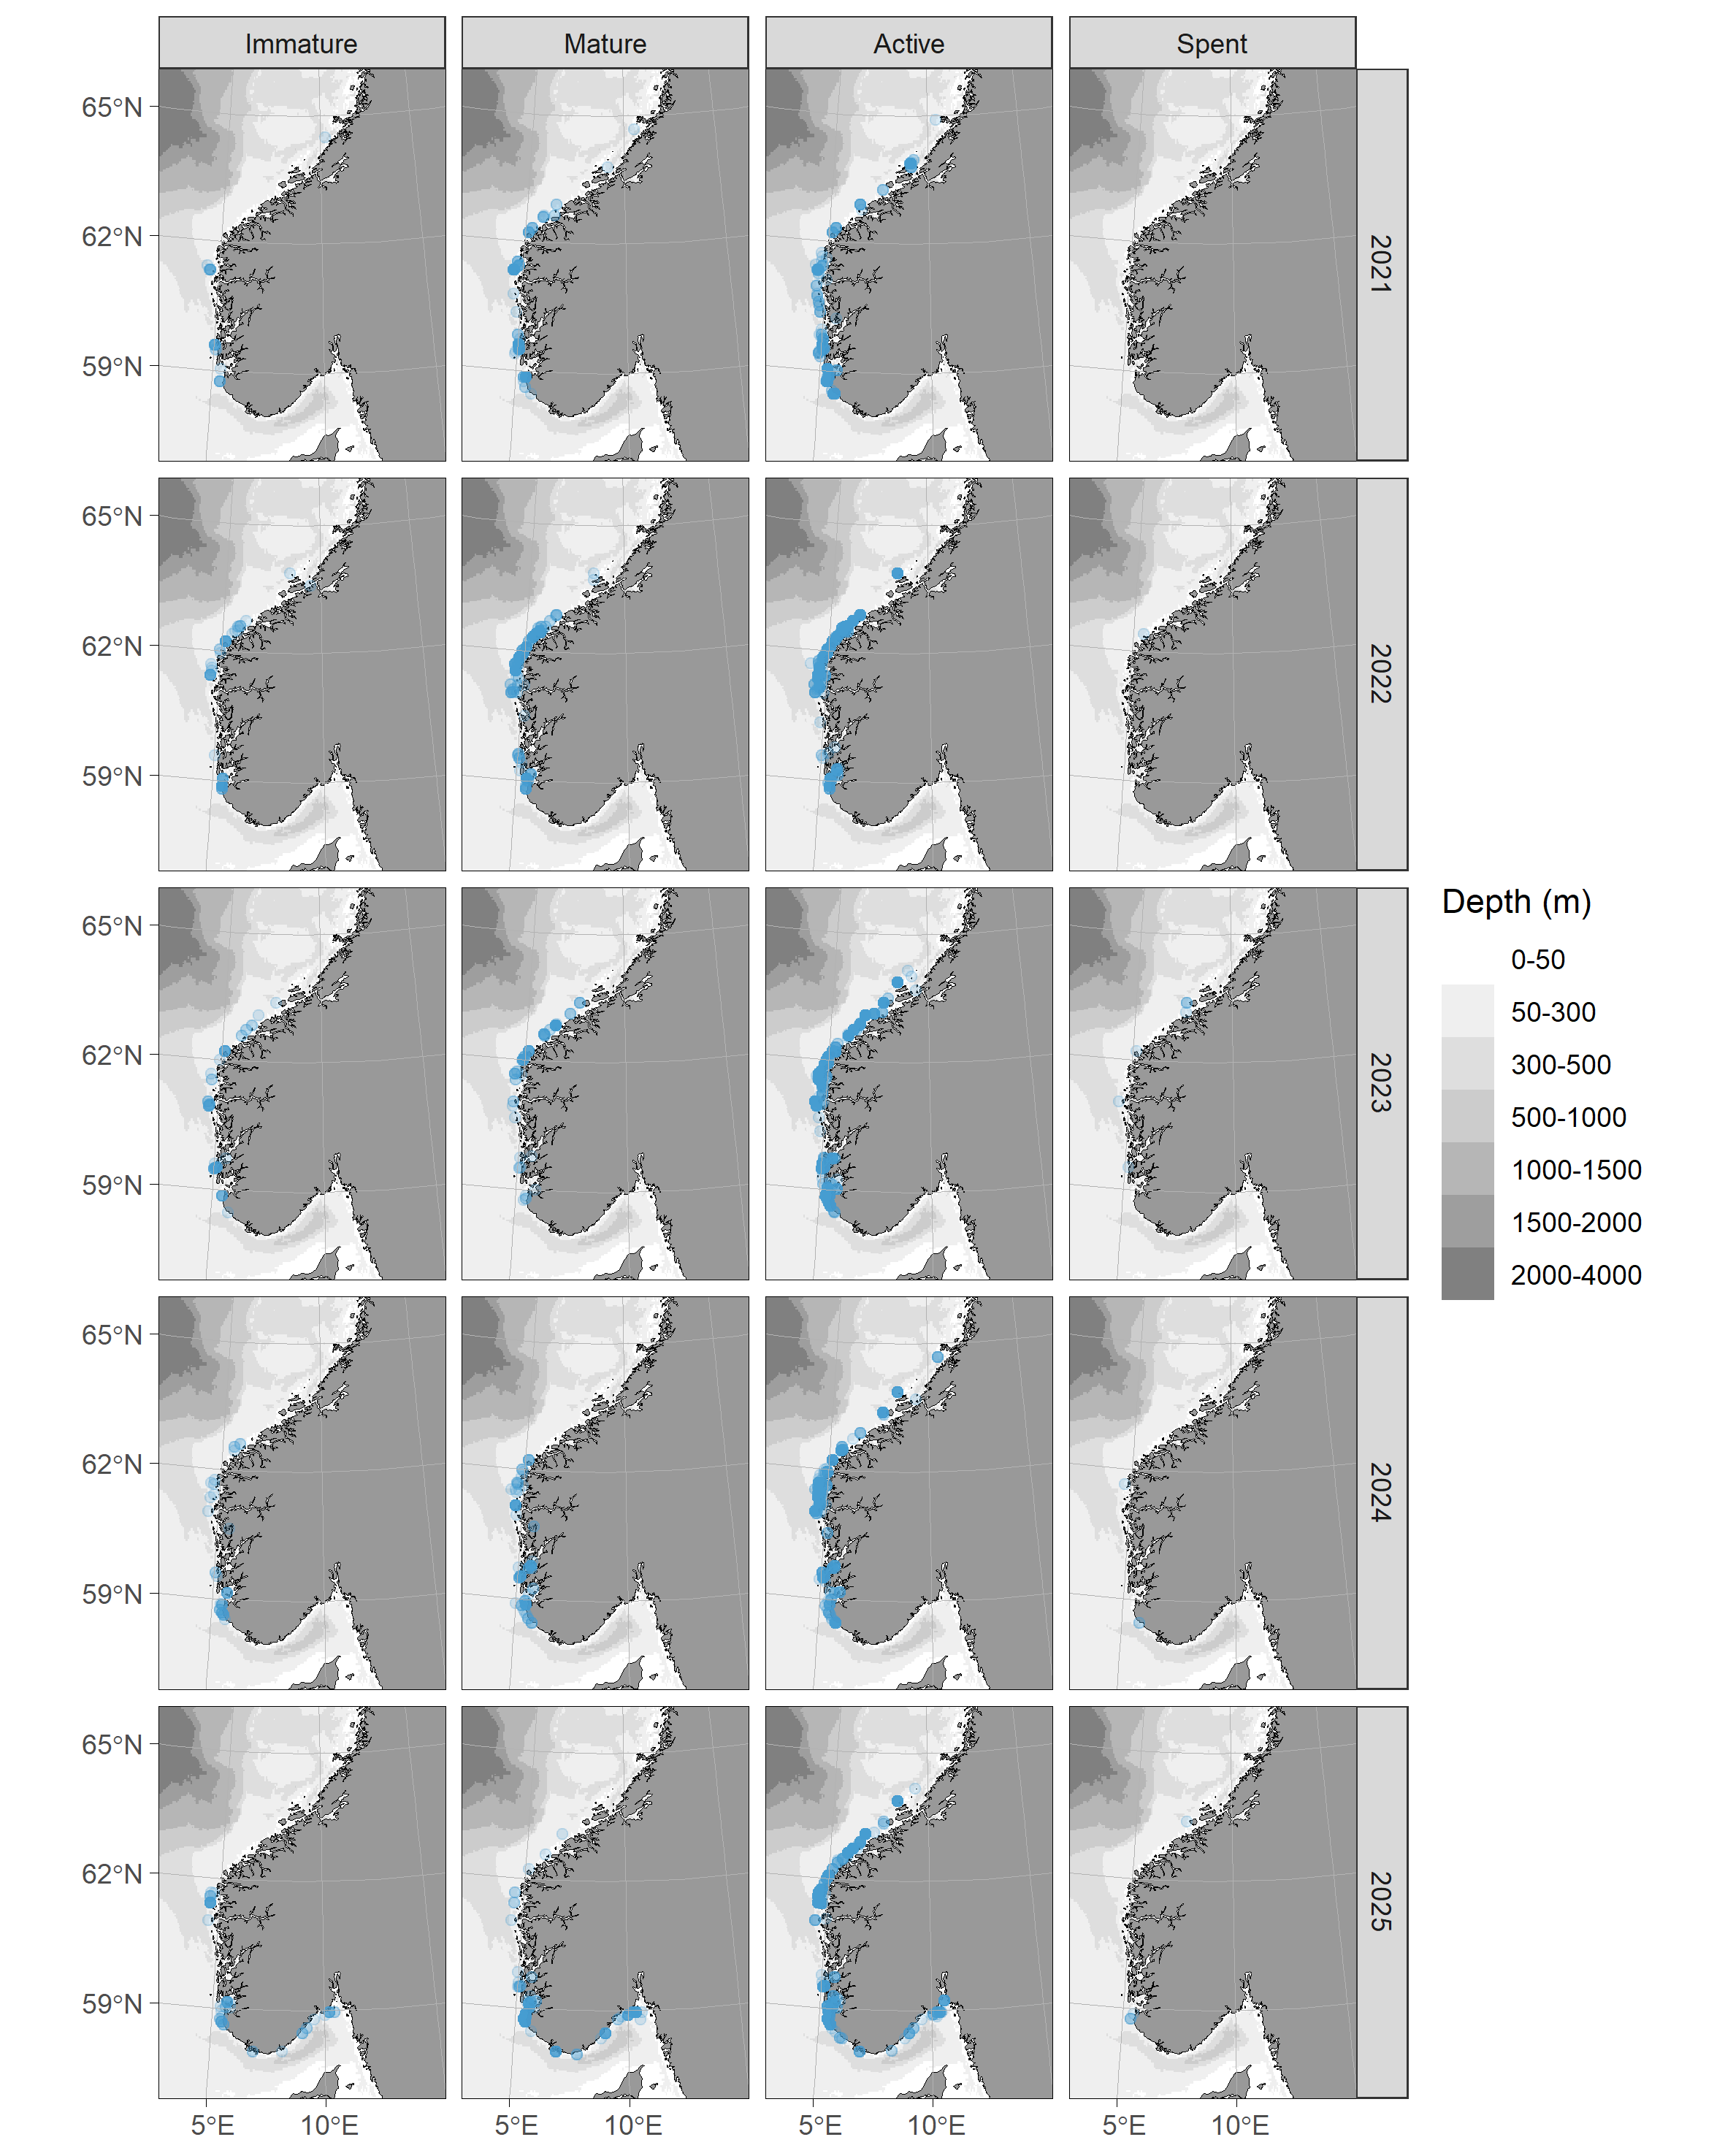


Supplementary figure 2: Distribution of females across years, with maturity stages grouped into four categories.


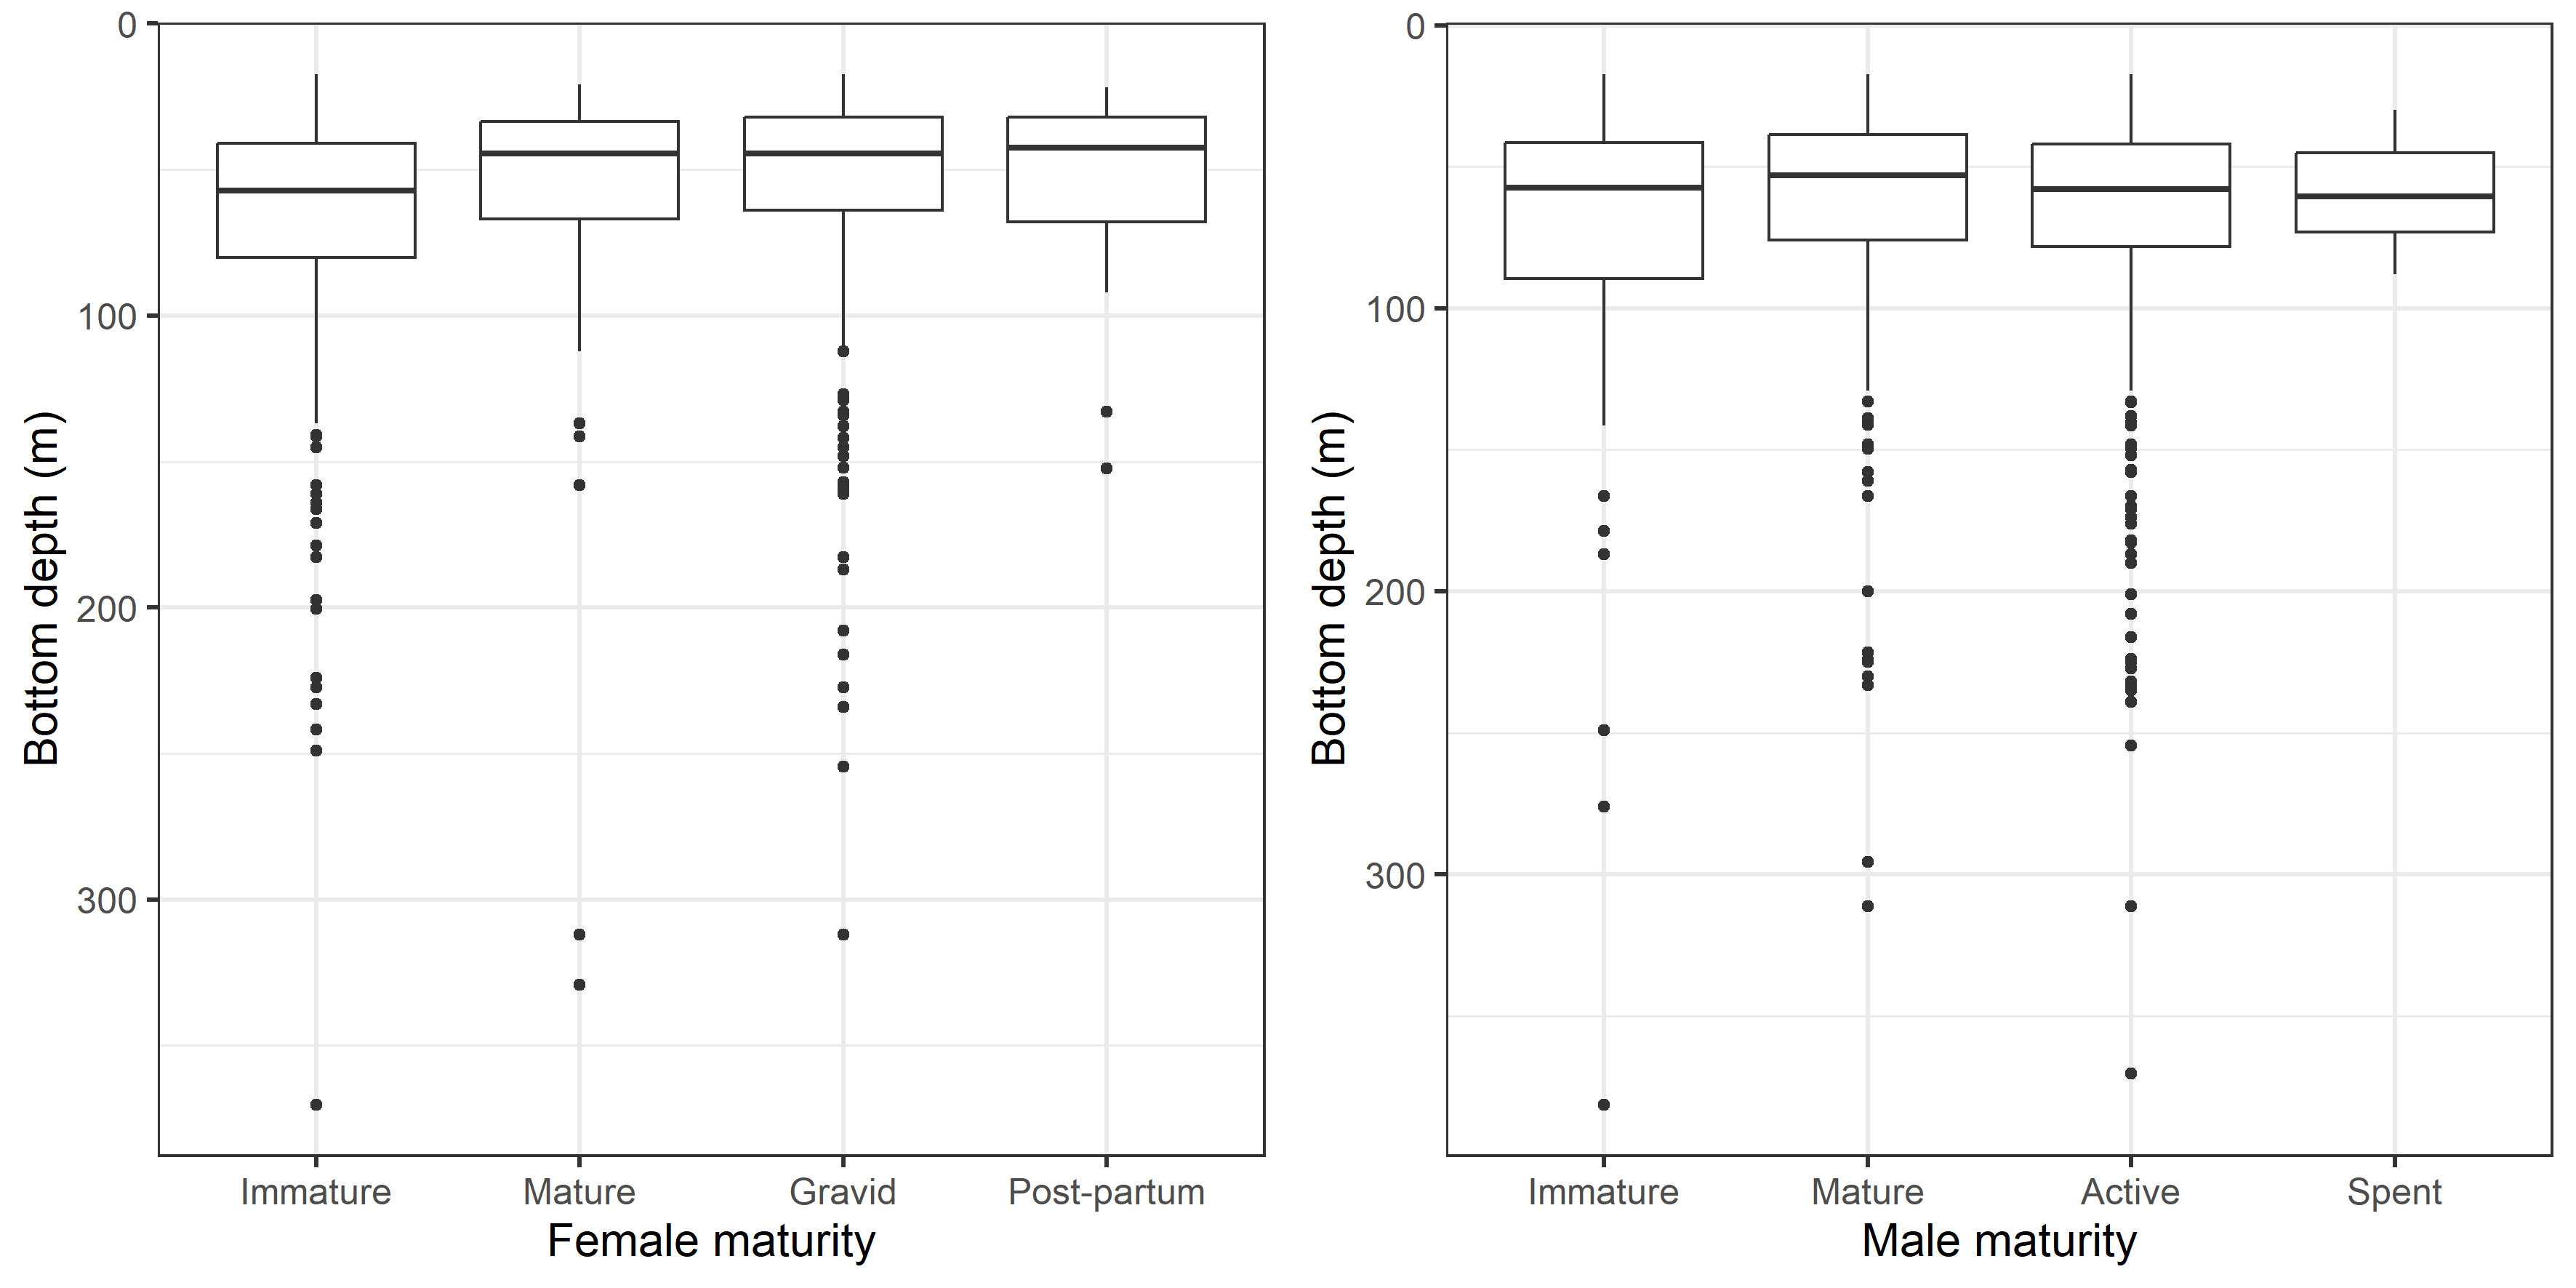


Supplementary figure 3: Bottom depth distributions of longline deployments with catches of females (left) and males (right) at different maturity stages.


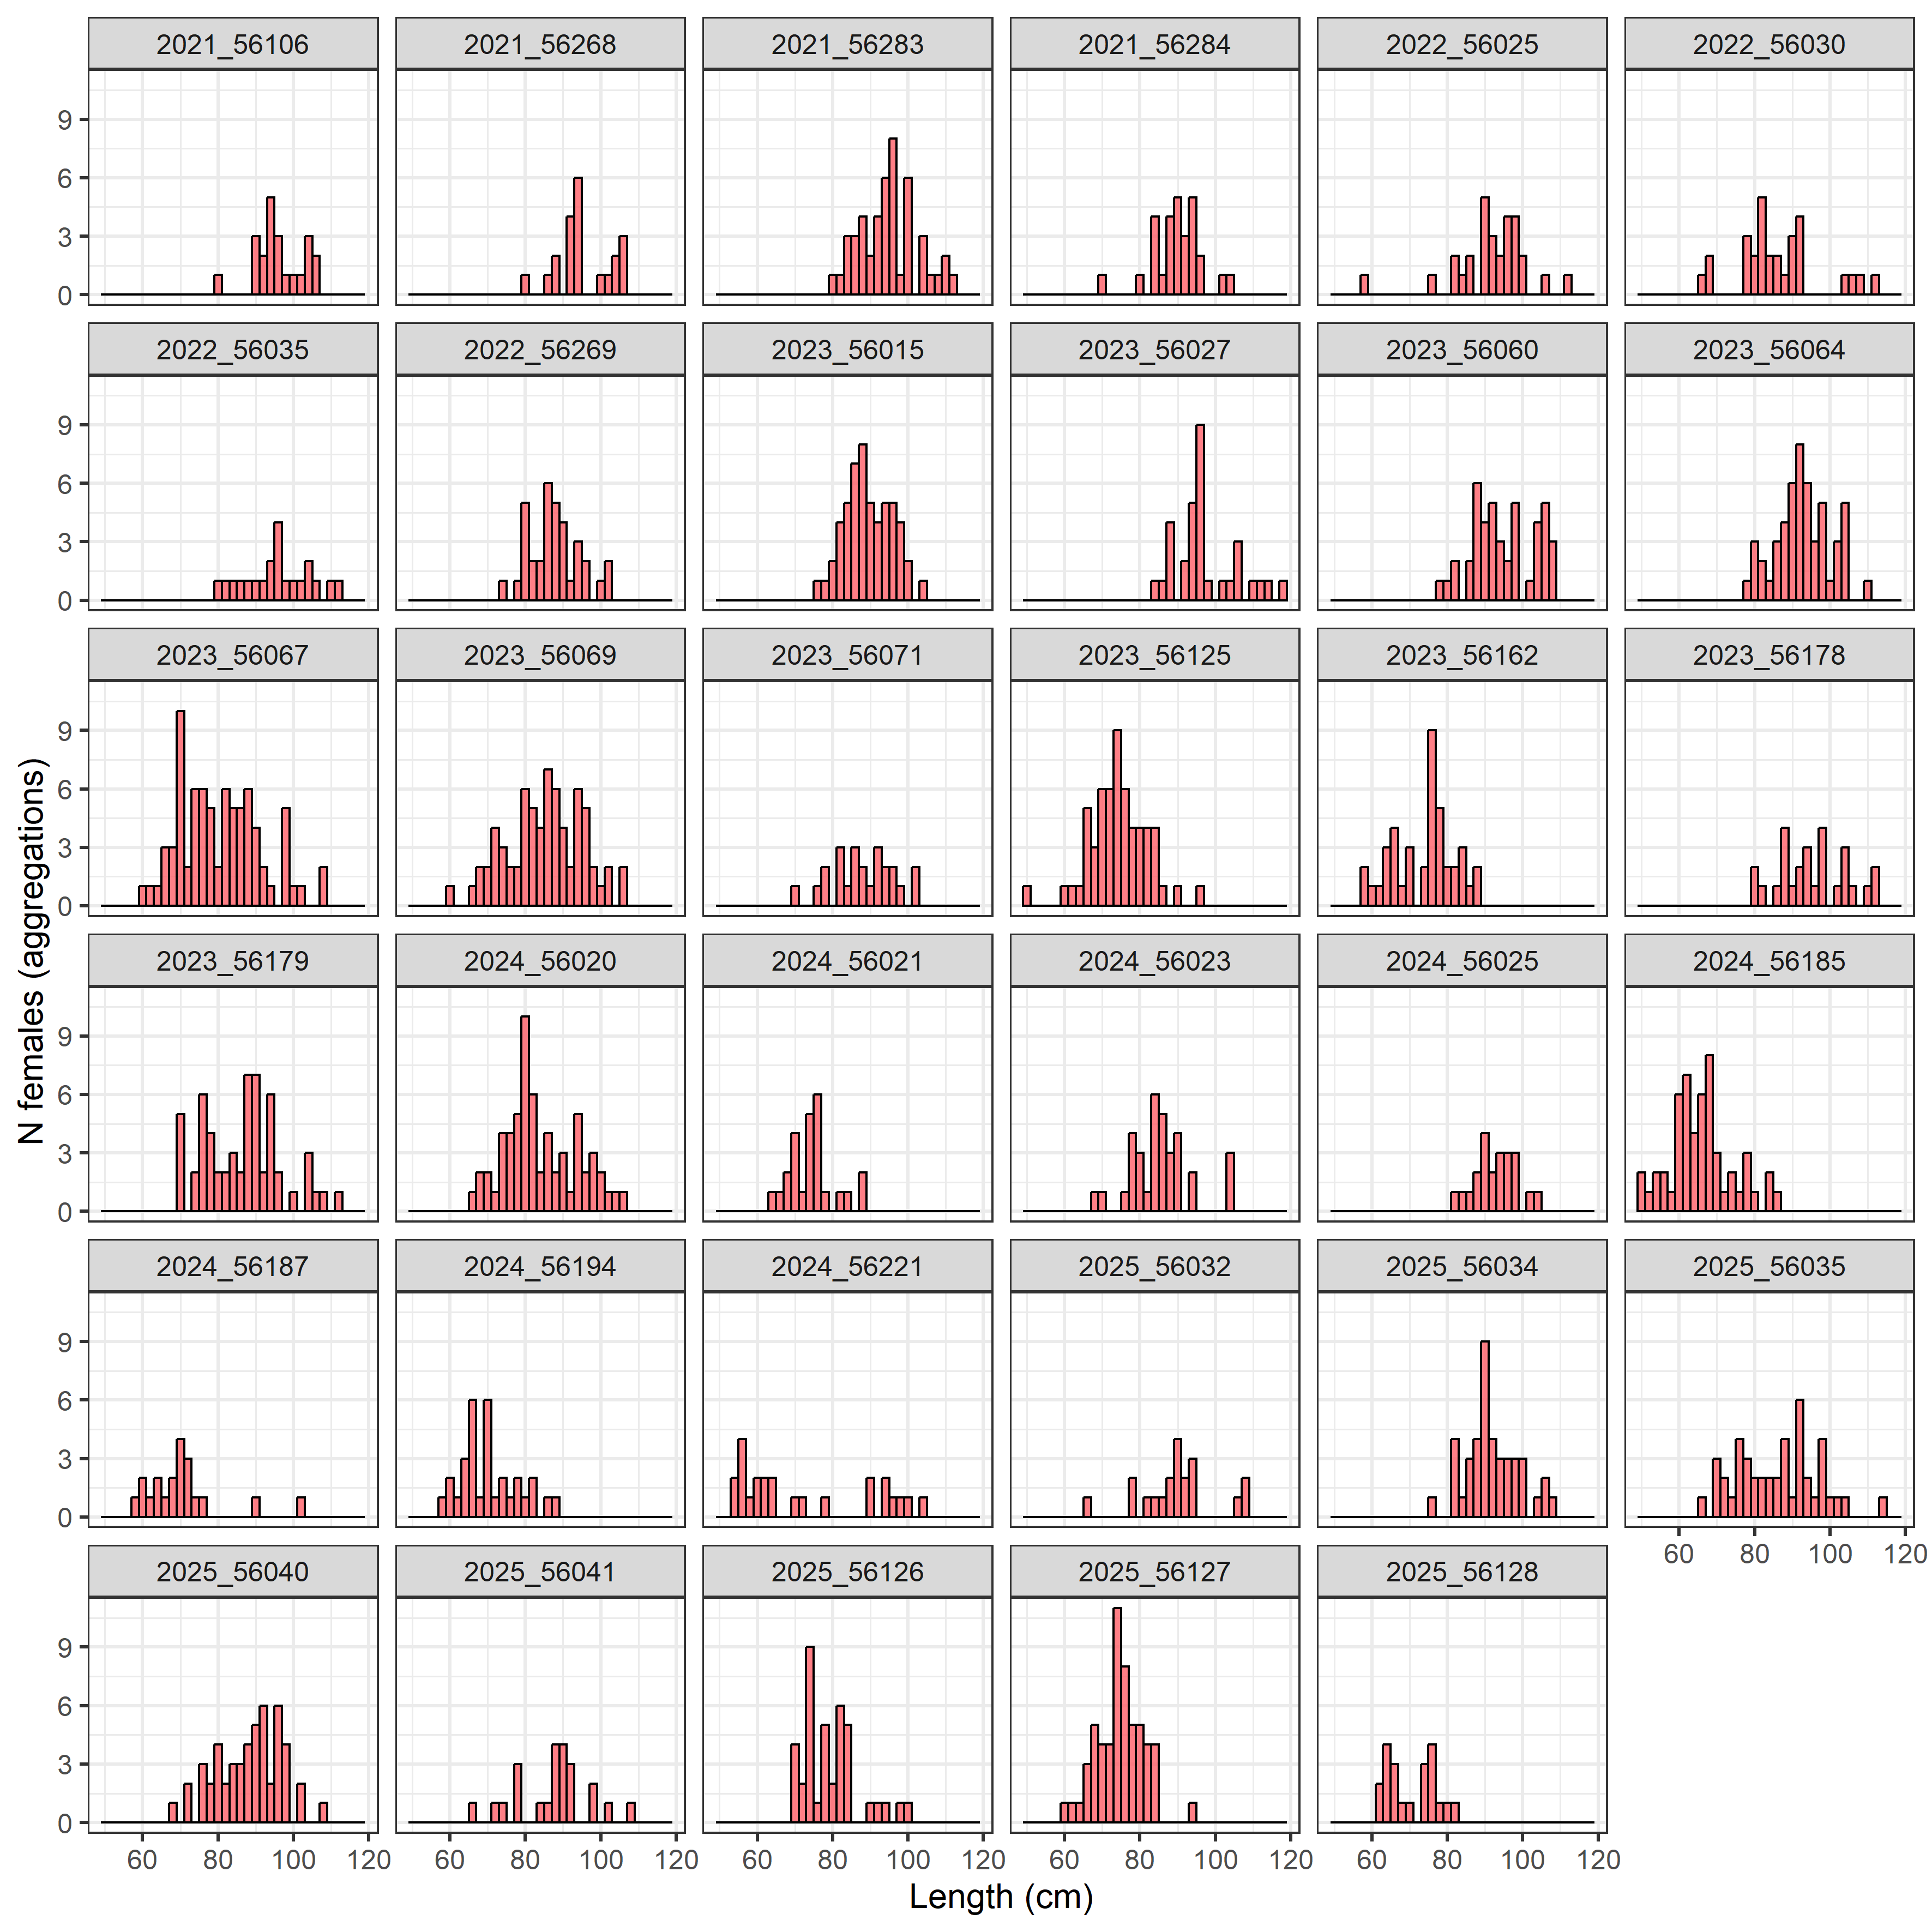


Supplementary figure 4: Size distributions of females caught at 32 stations identified as female-biased aggregation sites. Facet names indicate unique year and station numbers.


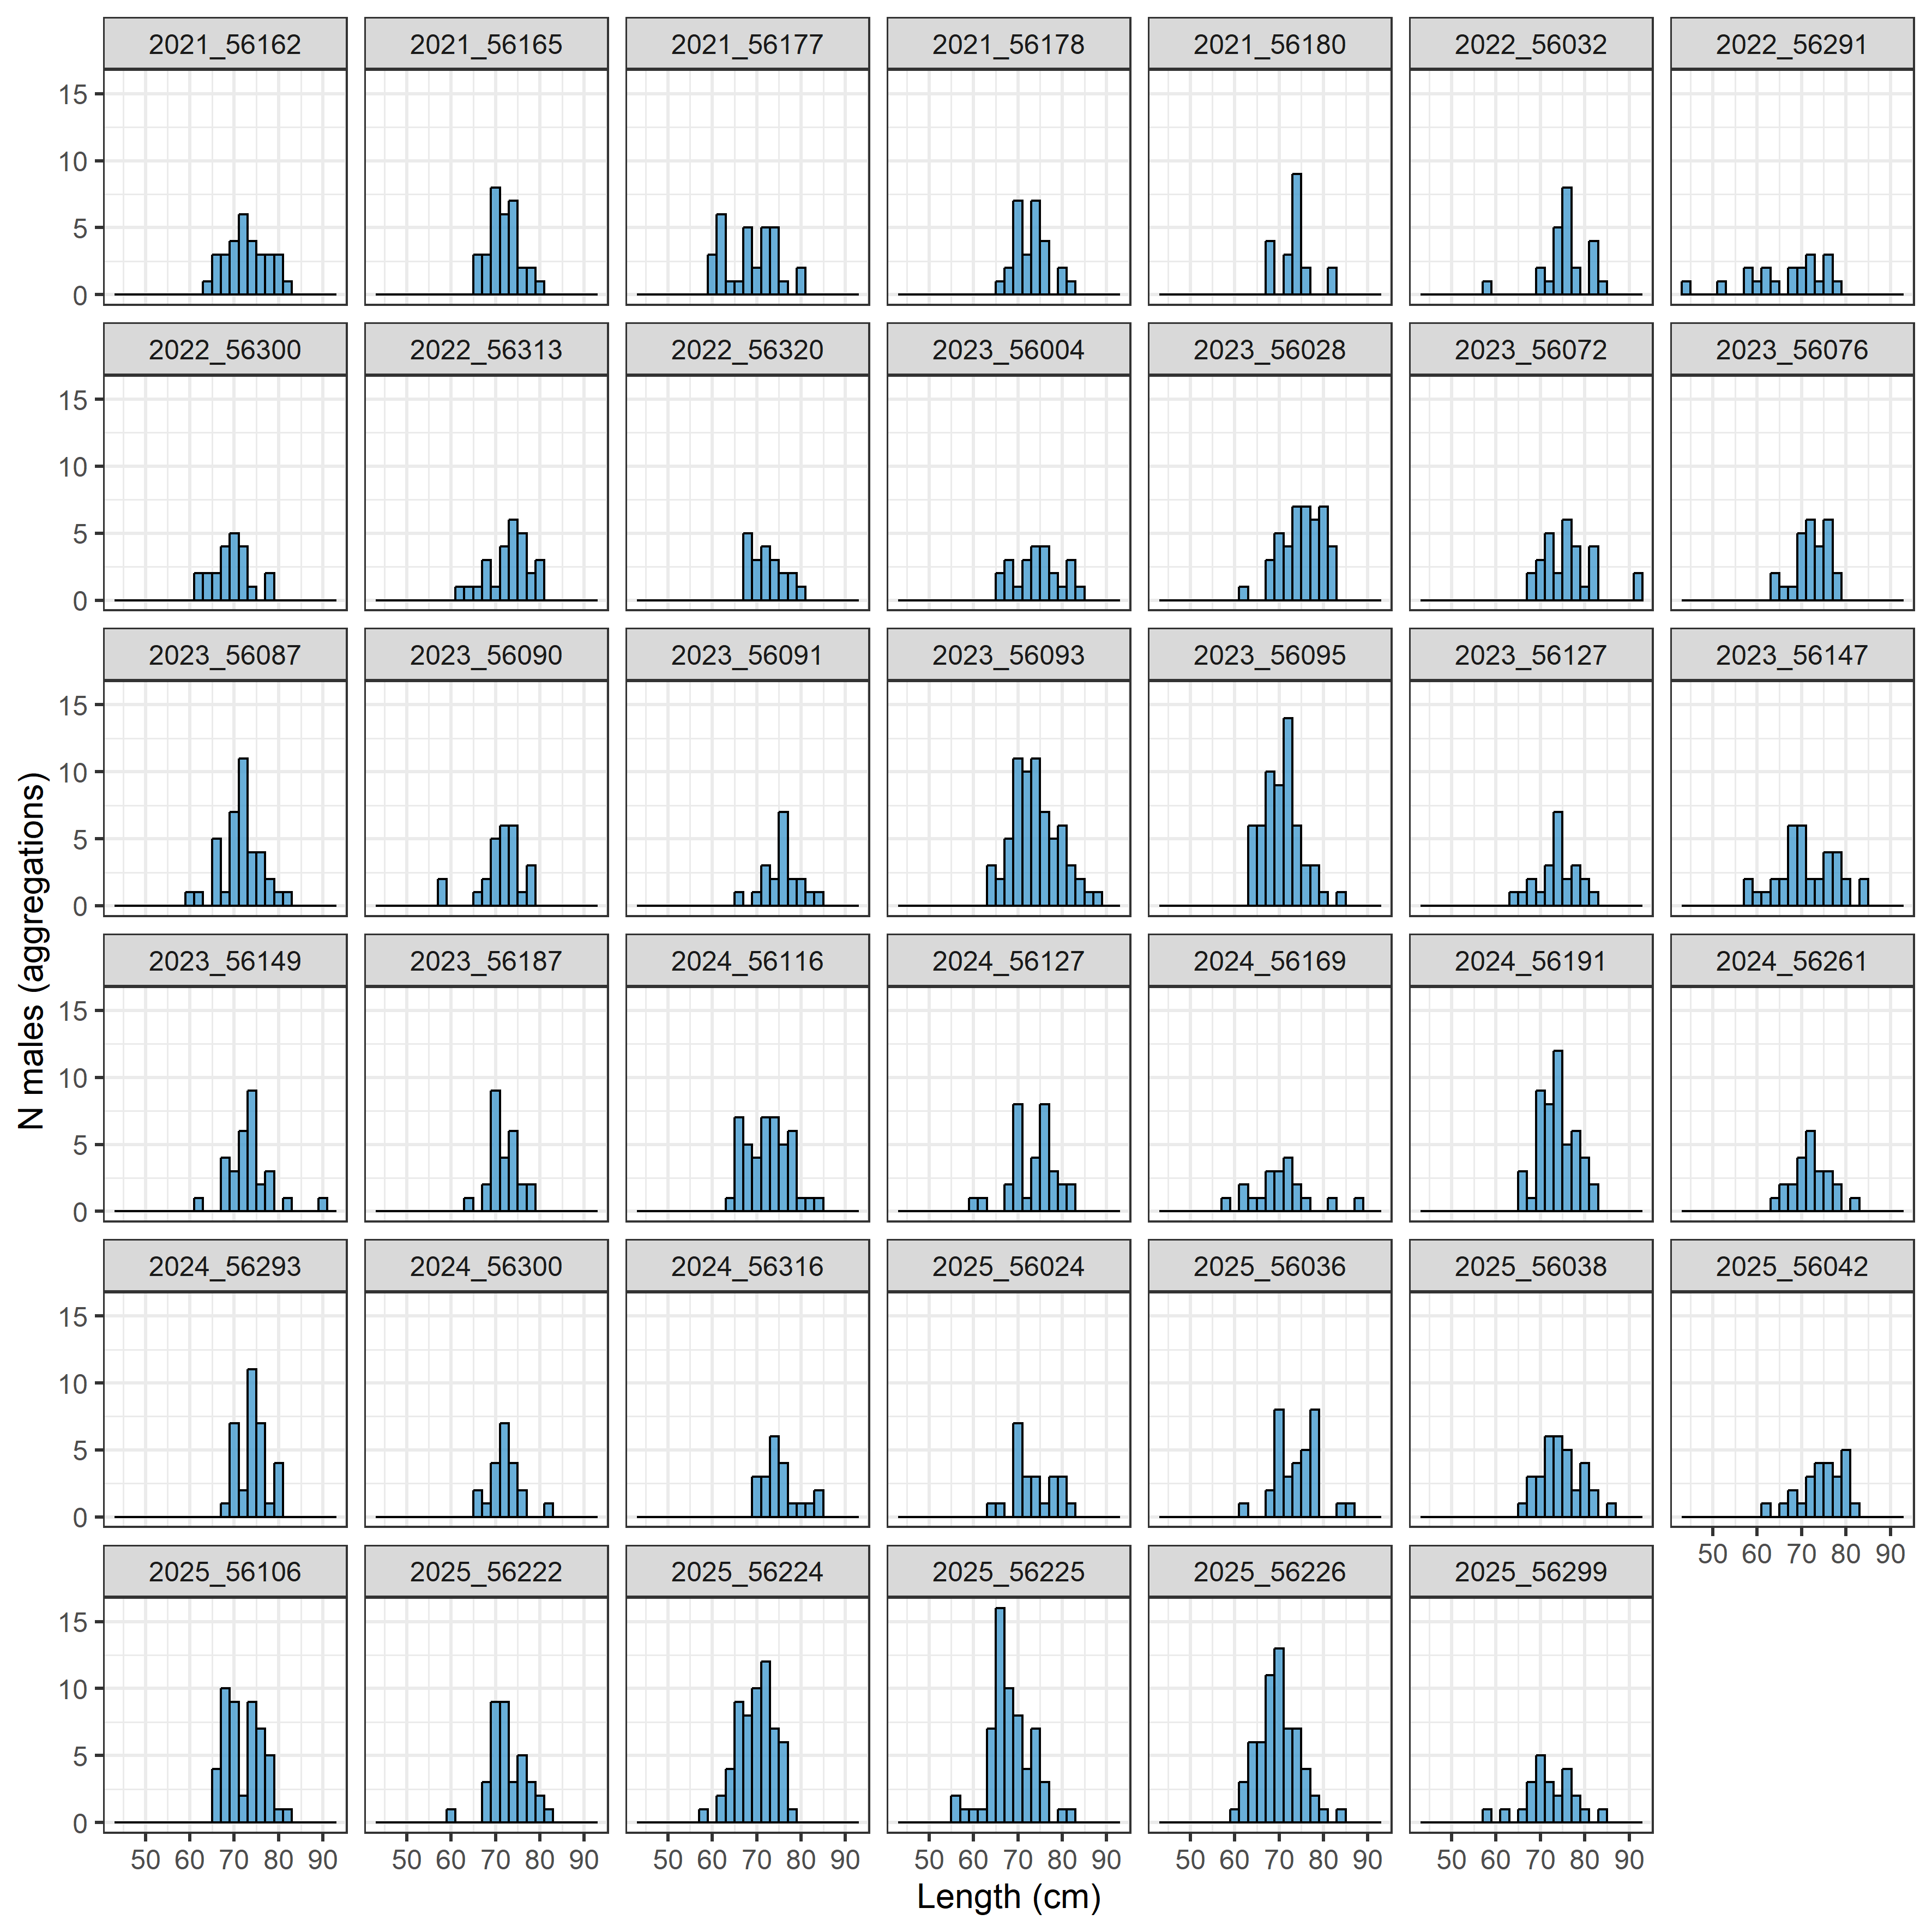


Supplementary figure 5: Size distributions of males caught at 40 stations identified as male-biased aggregation sites. Facet names indicate unique year and station numbers.


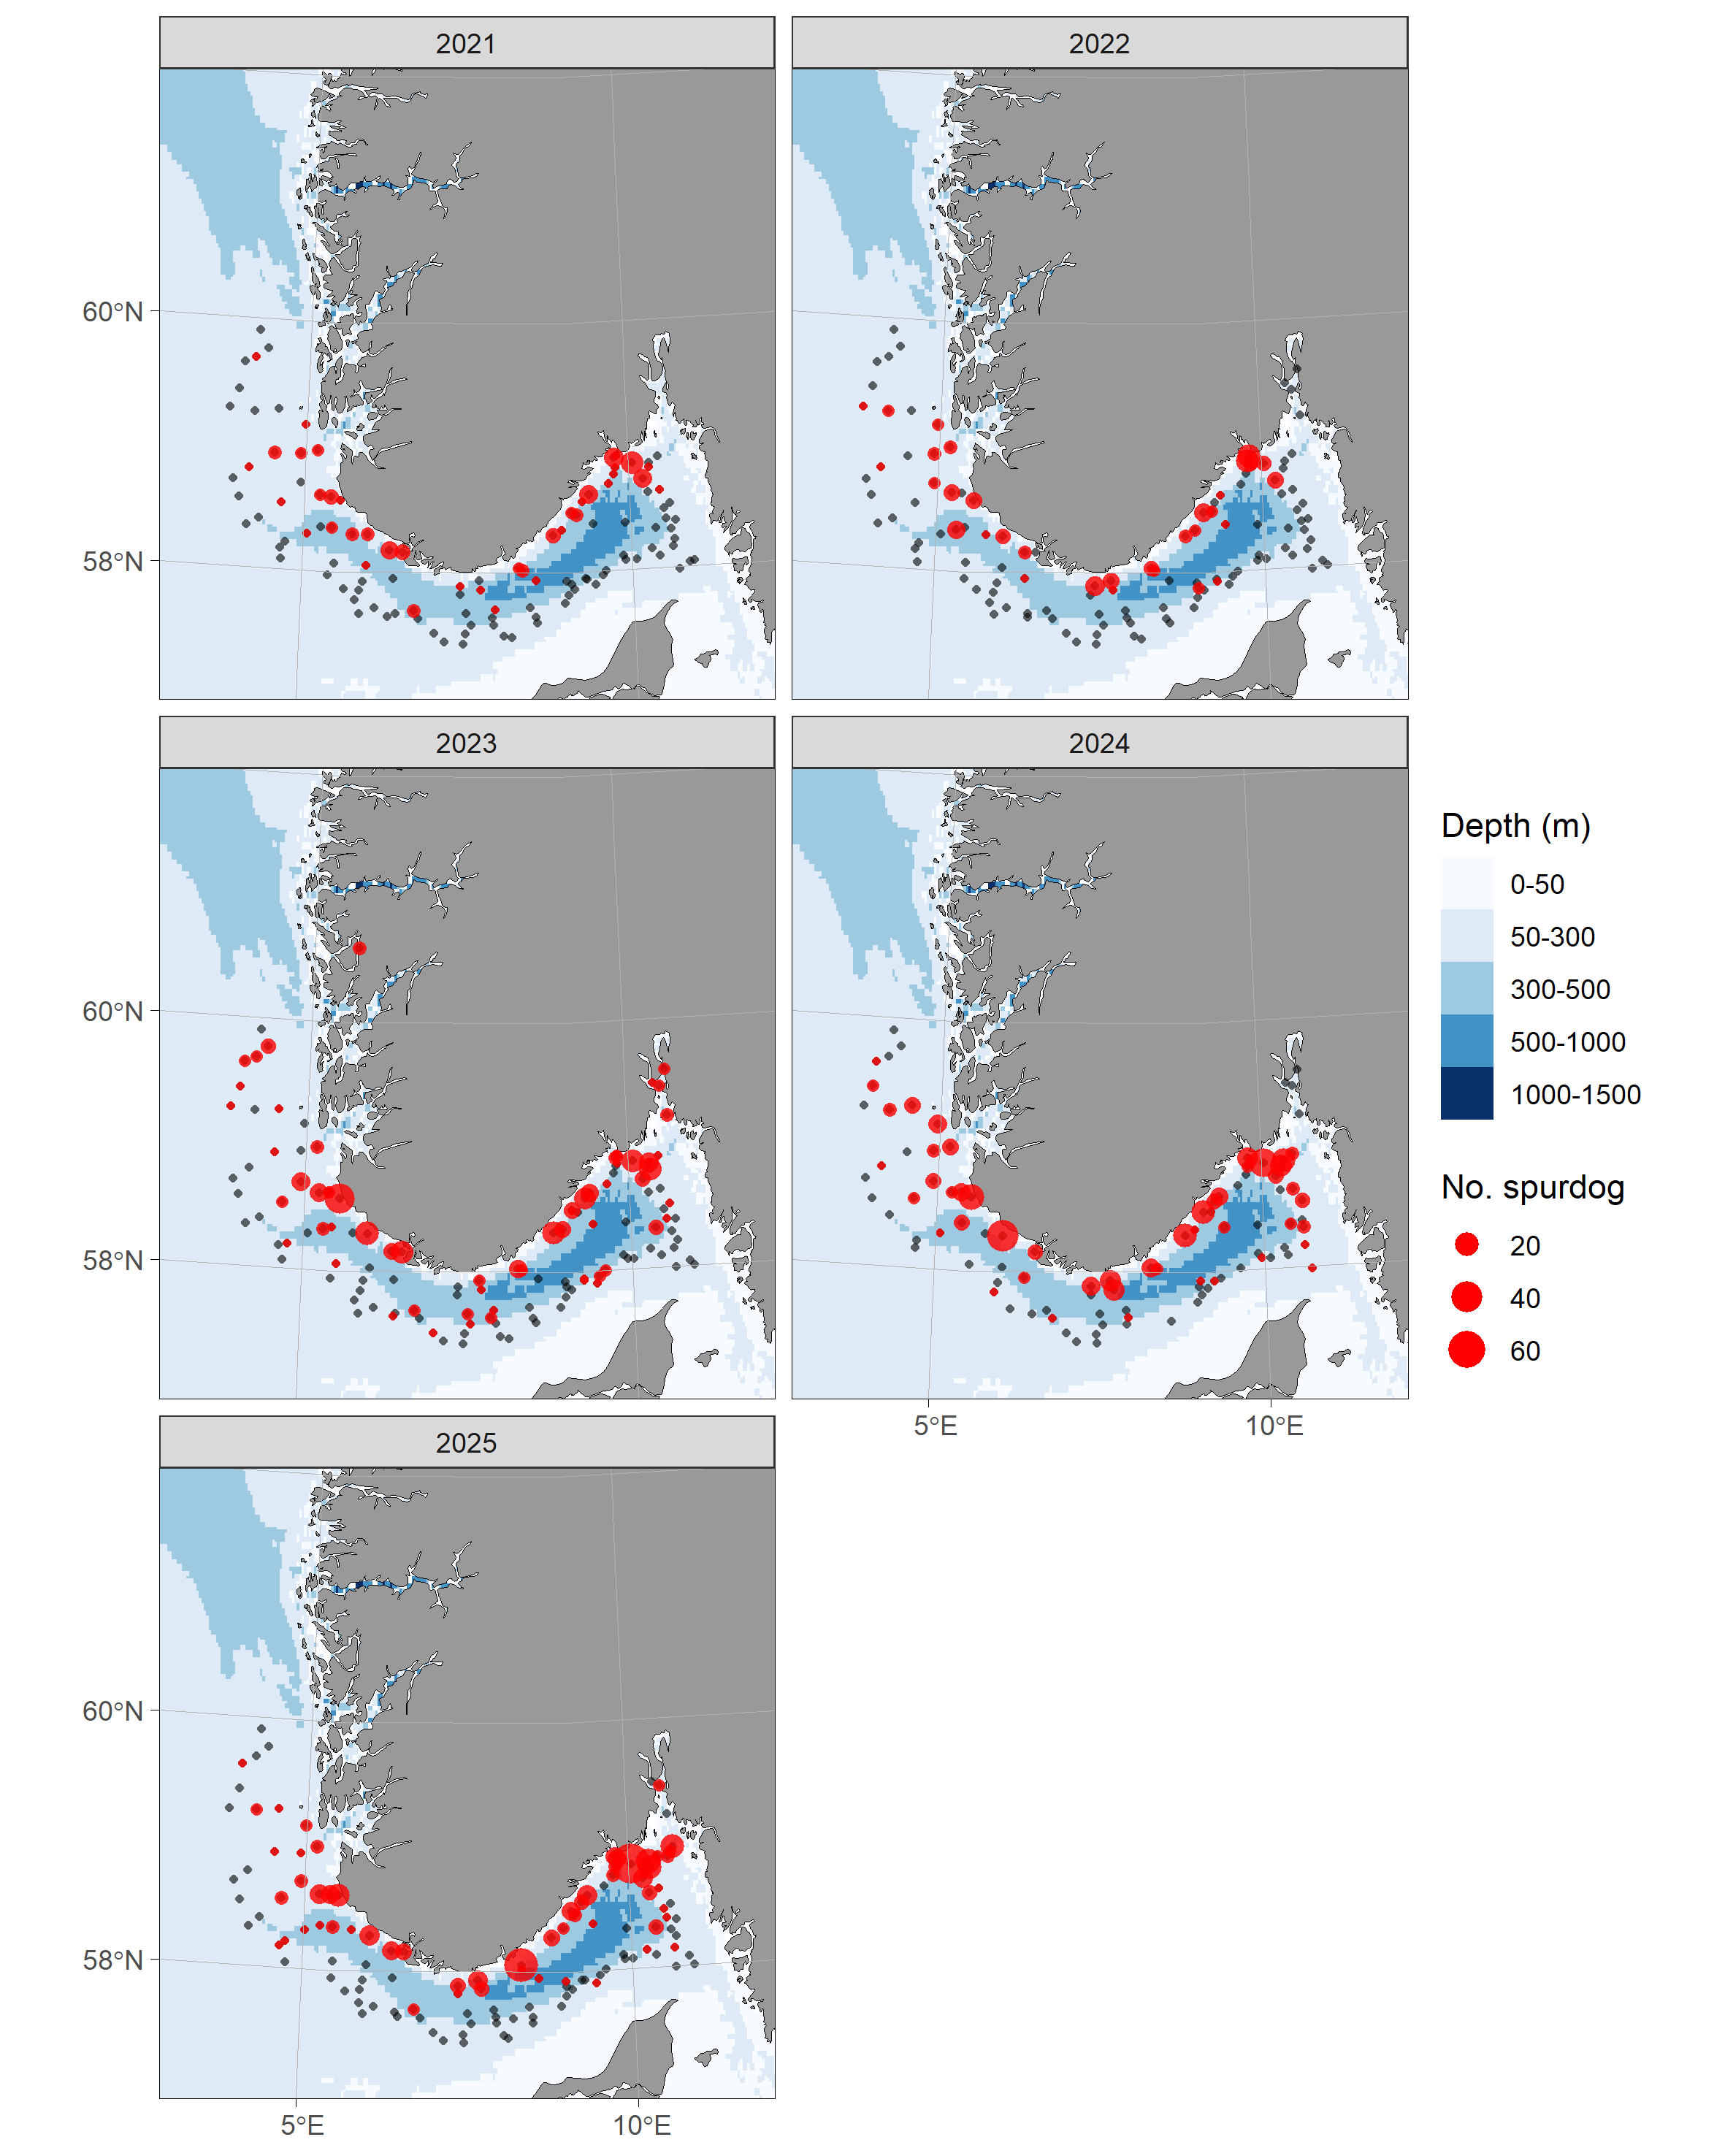


Supplementary figure 6: Catches of spurdog during the annual winter shrimp trawl survey in the Skagerrak between 2021-2025.


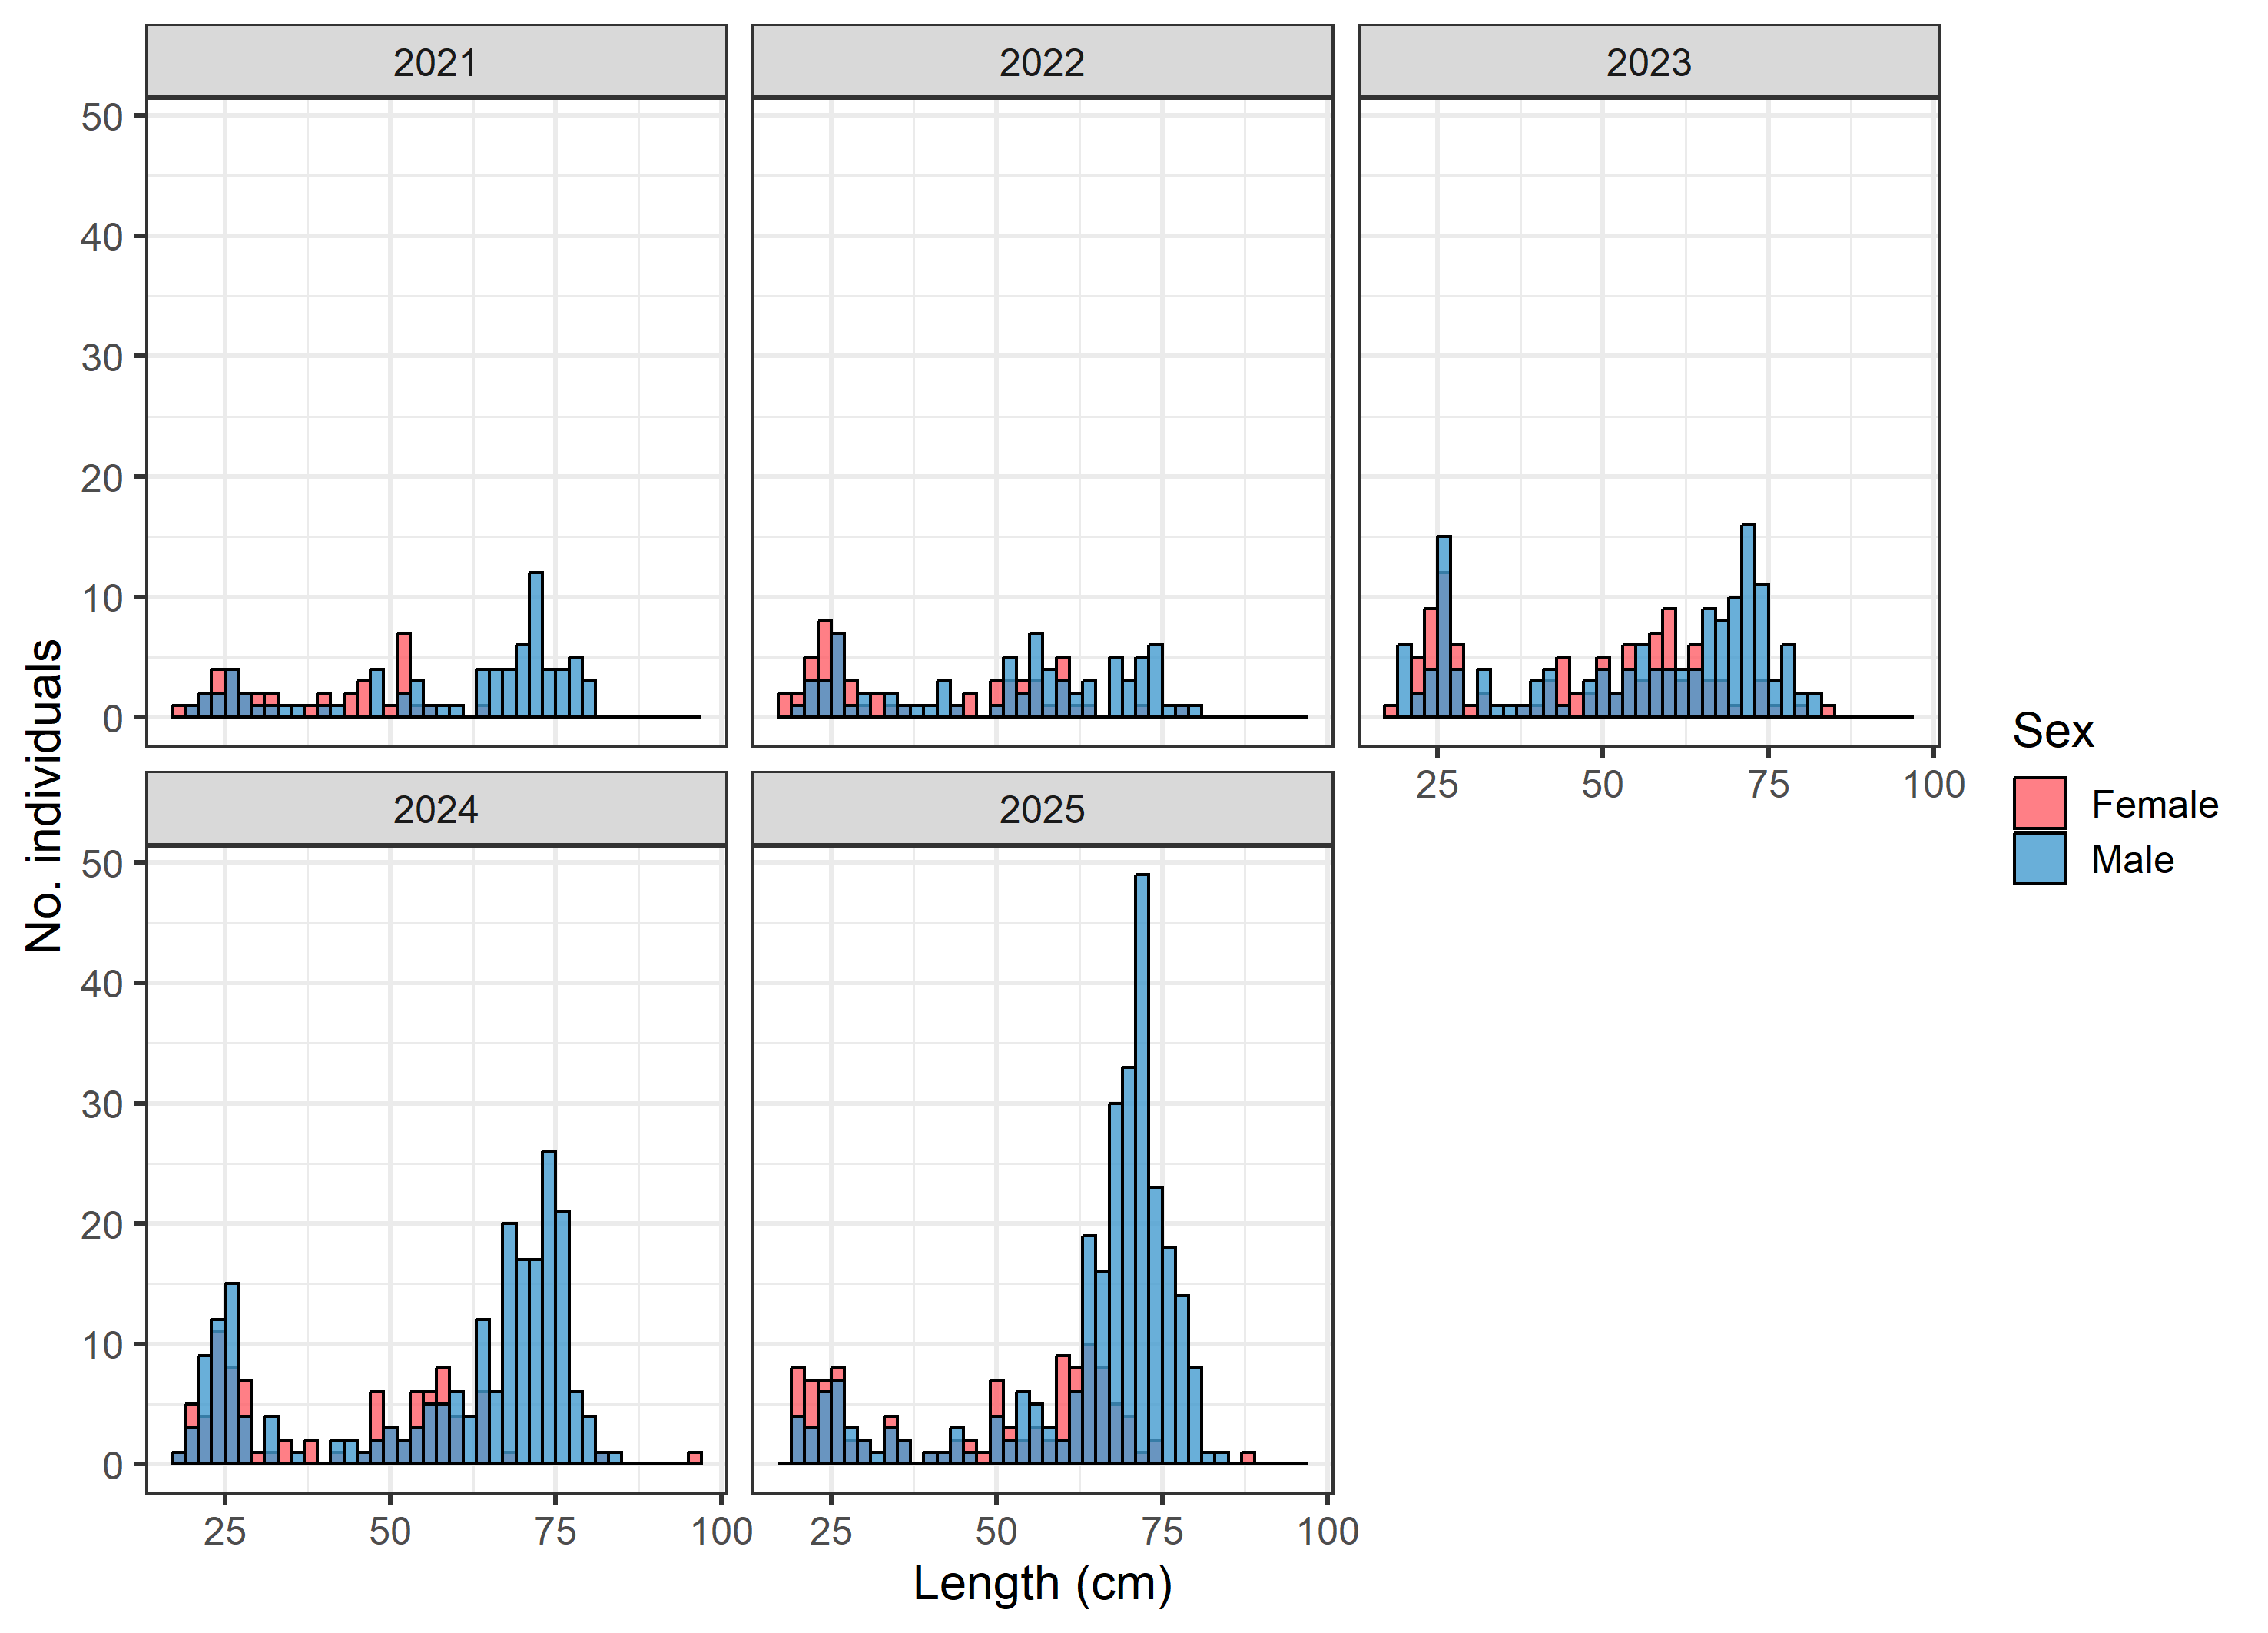


Supplementary figure 7: Size distribution of spurdog caught during the annual winter shrimp trawl survey in the Skagerrak between 2021-2025.

Supplementary table 1: Maturity stages for male and female spurdog, registered under the variable “specialstage” in the raw data file, available from the Norwegian Marine Data Centre (NMDC).

| Maturity stage | Female | Male |
| --- | --- | --- |
| 1 | **Immature**  Eggs not visible, or very small. Uteri and shell (oviducal) glands narrow and string-like. | **Immature**  Claspers are flexible and shorter than the pelvic fins. Small, undeveloped testes and string-like sperm ducts. |
| 2 | **Maturing**  Small-to-medium sized eggs. Uteri and shell glands developing. | **Maturing**  Claspers are flexible and equal to or longer than the pelvic fins. Testes are developing and sperm ducts are starting to coil. |
| 3 | **Mature**  Large, yellow eggs of similar size in the ovaries. Fully developed shell glands and uteri with thick walls. | **Mature**  Claspers are calcified and longer than the pelvic fins. Fully developed testes and coiled, sperm-filled sperm ducts. |
| 4 | **Early pregnancy**  Uteri contain yolk. Embryos not visible. | **Active**  Like stage 3, but pressing on the sperm ducts through the lower abdominal wall causes sperm secretions. |
| 5 | **Mid-pregnancy**  Uteri contain visible embryos with relatively large yolk sacs. | **Spent**  Claspers are fully developed, like stage 3, but testes are smaller and flaccid. Sperm ducts are empty. |
| 6 | **Late pregnancy**  Uteri contain fully developed embryos with small or absent yolk sacs. |  |
| 7 | **Post-partum**  Uteri fully expanded and reddish. Ovaries contain large, yellow eggs of similar size. |  |
| 8/9* | **Regenerating**  Ovaries contain large, yellow eggs of similar size. Uteri are enlarged, but not flaccid. |  |

*Regenerating female spurdog may be registered as stages 8 or 9 across various surveys in IMR’s database, depending on survey-specific sampling protocols.

Supplementary table 2: Qualitative readability score for age-reading of the second dorsal spine, registered under the variable “readability” in the raw data file, available from the Norwegian Marine Data Centre (NMDC).

| Readability score | Description |
| --- | --- |
| 1 | High certainty |
| 2 | Some uncertainty |
| 3 | Difficult to read or unreadable |
| 9 | Damaged or missing |
